# Supplementary material for: Rapid, non-targeted discovery of biochemical transformation and biomarker candidates in oncovirus-infected cell lines using LAESI mass spectrometry
Source: Royal Society of Chemistry journal article supplement (doi:10.1039/c2cc17225a), 2011-12-14
Supplement: c2cc17225a.pdf [file c2cc17225a.pdf]

# Electronic Supplementary Information COMMUNICATION

---

## Rapid, non-targeted discovery of biochemical transformation and biomarker candidates in oncovirus-infected cell lines using LAESI mass spectrometry

Bindesh Shrestha<sup>a</sup>, Prabhakar Sripadi<sup>a</sup>, Callee M. Walsh<sup>b</sup>, Trust T. Razunguzwa<sup>b</sup>, Matthew J. Powell,<sup>b</sup>  
Kylene Kehn-Hall,<sup>c</sup> Fatah Kashanchi<sup>c</sup> and Akos Vertes\*<sup>a</sup>

<sup>a</sup>*Department of Chemistry, W.M. Keck Institute of Proteomics Technology and Applications, The George Washington University, Washington D.C, USA. Fax: +1-202-994-5873 Tel: +1-202-994-2717; E-mail: [vertes@gwu.edu](mailto:vertes@gwu.edu)*

<sup>b</sup>*Protea Biosciences, 955 Hartman Run Road, Morgantown, WV 26505*

<sup>c</sup>*Department of Molecular and Microbiology, National Center for Biodefense and Infectious Diseases, George Mason University, Manassas, VA 20110, USA.*

15

**Table S1.** Putative assignments of ions corresponding to the numbered points found in the wings of the S-plot in Figure 2 and the histogram in Figure 3. Table S1 only shows the assignments selected on the basis of exhibiting the most variance in the mass spectra between the affected and control cell lines. Numerous other ions were also detected but did not show major changes between the two groups.

| SN | Putative Assignments | Ion                                                                                                                                   | Monoisotopic $m/z$   | Measured Average $m/z$ | $\Delta m$ (mDa) | Factor of Change |              |
|----|----------------------|---------------------------------------------------------------------------------------------------------------------------------------|----------------------|------------------------|------------------|------------------|--------------|
|    |                      |                                                                                                                                       |                      |                        |                  | Down regulated   | Up regulated |
| 1  | unassigned           |                                                                                                                                       |                      | 678.5152               |                  |                  | 7.2±2.1      |
| 2  | unassigned           |                                                                                                                                       |                      | 707.5327               |                  |                  | 3.3±0.4      |
| 3  | PC(30:0)             | C <sub>38</sub> H <sub>76</sub> NO <sub>8</sub> P+H <sup>+</sup>                                                                      | 706.5387             | 706.5423               | 3.6              |                  | 3.1±0.3      |
| 4  | PE(34:2)             | C <sub>39</sub> H <sub>74</sub> NO <sub>8</sub> P+H <sup>+</sup>                                                                      | 716.5230             | 716.5443               | 21.3             |                  | 3.1±0.3      |
| 5  | thymosin β4          | C <sub>212</sub> H <sub>350</sub> N <sub>56</sub> O <sub>78</sub> S <sub>1</sub> +7H <sup>+7</sup>                                    | 710.0806             | 710.0843               | 3.7              |                  | 11.2±4.8     |
| 6  | PC(32:0)             | C <sub>40</sub> H <sub>80</sub> NO <sub>8</sub> P+H <sup>+</sup>                                                                      | 734.5700             | 734.5634               | -6.6             |                  | 2.6±0.2      |
| 7  | PC(32:1)             | C <sub>40</sub> H <sub>78</sub> NO <sub>8</sub> P+H <sup>+</sup>                                                                      | 732.5543             | 732.5581               | 3.8              |                  | 1.8±0.1      |
| 8  | PC(32:2)             | C <sub>40</sub> H <sub>76</sub> NO <sub>8</sub> P+H <sup>+</sup>                                                                      | 730.5387             | 730.5405               | 1.8              |                  | 2.5±0.2      |
| 9  | unassigned           |                                                                                                                                       |                      | 729.5273               |                  |                  | 3.1±0.4      |
| 10 | PC(32:3)             | C <sub>40</sub> H <sub>74</sub> NO <sub>8</sub> P+H <sup>+</sup>                                                                      | 728.5230             | 728.5353               | 12.3             |                  | 3.6±0.3      |
| 11 | unassigned           |                                                                                                                                       |                      | 735.5429               |                  |                  | 2.3±0.2      |
| 12 | PC(34:3)<br>PC(32:0) | C <sub>42</sub> H <sub>78</sub> NO <sub>8</sub> P+H <sup>+</sup><br>C <sub>40</sub> H <sub>80</sub> NO <sub>8</sub> P+Na <sup>+</sup> | 756.5543<br>756.5519 | 756.5322               | -22.1<br>-19.7   |                  | 1.9±0.1      |
| 13 | unassigned           |                                                                                                                                       |                      | 755.5476               |                  |                  | 2.1±0.2      |
| 14 | PC(34:4)             | C <sub>42</sub> H <sub>76</sub> NO <sub>8</sub> P+H <sup>+</sup>                                                                      | 754.5387             | 754.5399               | 1.2              |                  | 1.9±0.1      |
| 15 | unassigned           |                                                                                                                                       |                      | 781.5575               |                  |                  | 2.2±0.3      |
| 16 | PC(36:5)             | C <sub>44</sub> H <sub>78</sub> NO <sub>8</sub> P+H <sup>+</sup>                                                                      | 780.5543             | 780.5441               | -10.2            |                  | 1.6±0.1      |
| 17 | thymosin β4          | C <sub>212</sub> H <sub>350</sub> N <sub>56</sub> O <sub>78</sub> S <sub>1</sub> +6H <sup>+6</sup>                                    | 828.5954             | 828.5778               | -17.6            |                  | 2.5±0.4      |
| 18 | thymosin β4          | C <sub>212</sub> H <sub>350</sub> N <sub>56</sub> O <sub>78</sub> S <sub>1</sub> +6H <sup>+6</sup>                                    | 828.2594             | 828.1824               | -77.0            |                  | 3.9±0.4      |
| 19 | unassigned           |                                                                                                                                       |                      | 706.2482               |                  |                  | 8.0±0.1      |
| 20 | PA (O-37:1)          | C <sub>40</sub> H <sub>79</sub> O <sub>7</sub> P+H <sup>+</sup>                                                                       | 703.5641             | 703.5728               | 8.7              |                  | 2.4±0.0      |
| 21 | unassigned           |                                                                                                                                       |                      | 747.5930               |                  |                  | 1.9±0.0      |
| 22 | PC(35:1)             | C <sub>43</sub> H <sub>84</sub> NO <sub>8</sub> P+H <sup>+</sup>                                                                      | 774.6012             | 774.6004               | -0.8             |                  | 2.2±0.0      |
| 23 | PC(34:1)             | C <sub>42</sub> H <sub>82</sub> NO <sub>8</sub> P+K <sup>+</sup>                                                                      | 798.5414             | 798.5606               | 19.2             |                  | 1.9±0.0      |
| 24 | unassigned           |                                                                                                                                       |                      | 797.5982               |                  |                  | 2.0±0.0      |
| 25 | PC(37:4)             | C <sub>45</sub> H <sub>82</sub> NO <sub>8</sub> P+H <sup>+</sup>                                                                      | 796.5856             | 796.5830               | -2.6             |                  | 1.6±0.0      |
| 26 | PC(39:4)             | C <sub>47</sub> H <sub>86</sub> NO <sub>8</sub> P+H <sup>+</sup>                                                                      | 824.6170             | 824.5488               | -68.2            |                  | 1.8±0.1      |
| 27 | thymosin β10         | C <sub>211</sub> H <sub>353</sub> N <sub>57</sub> O <sub>76</sub> S+6H <sup>+6</sup>                                                  | 823.5976             | 823.5300               | -67.6            |                  | 2.3±0.0      |

[a] The monoisotopic masses were calculated using the NIST Isotope Calculator package (ISOFORM, Version 1.02) or MoIE - Molecular Mass Calculator v2.02 (<http://library.med.utah.edu/masspec/mole.htm>). The measured  $m/z$  values were obtained by averaging  $m/z$  values in mass spectra from parallel samples.

[b] Glycerophosphocholines (PC), glycerophosphates (PA), and phosphatidylethanolamines (PE) species are identified by the total length of the acyl chain(s) and the number of double bonds in parentheses.

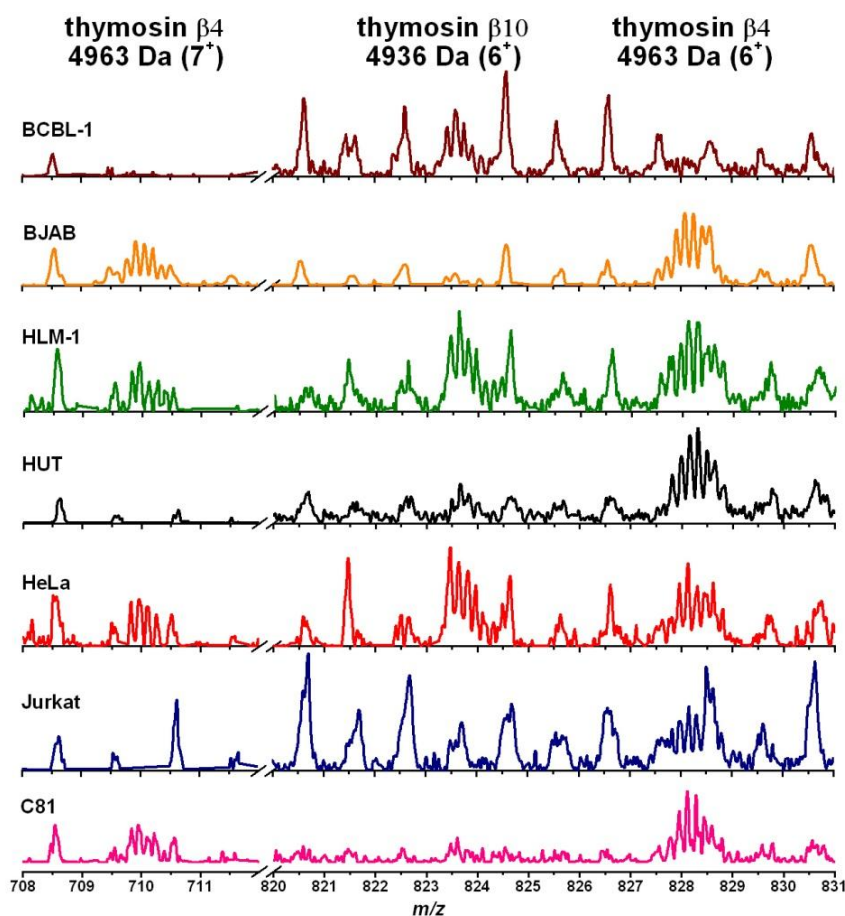

**Fig. S1** LAESI-MS analysis of seven different cell lines indicates differences in expression of thymosin  $\beta_4$  and  $\beta_{10}$ . Multiply-charged ion peaks with +6 charge state at  $\sim m/z$  823 were assigned to thymosin  $\beta_{10}$ . Ions with charge states of +7 and +6 at  $\sim m/z$  710 and 828, respectively, were assigned to thymosin  $\beta_4$ . Thymosin  $\beta_4$  expression is reduced in BCBL-1 cells, while thymosin  $\beta_{10}$  expression is reduced in BJAB cells.

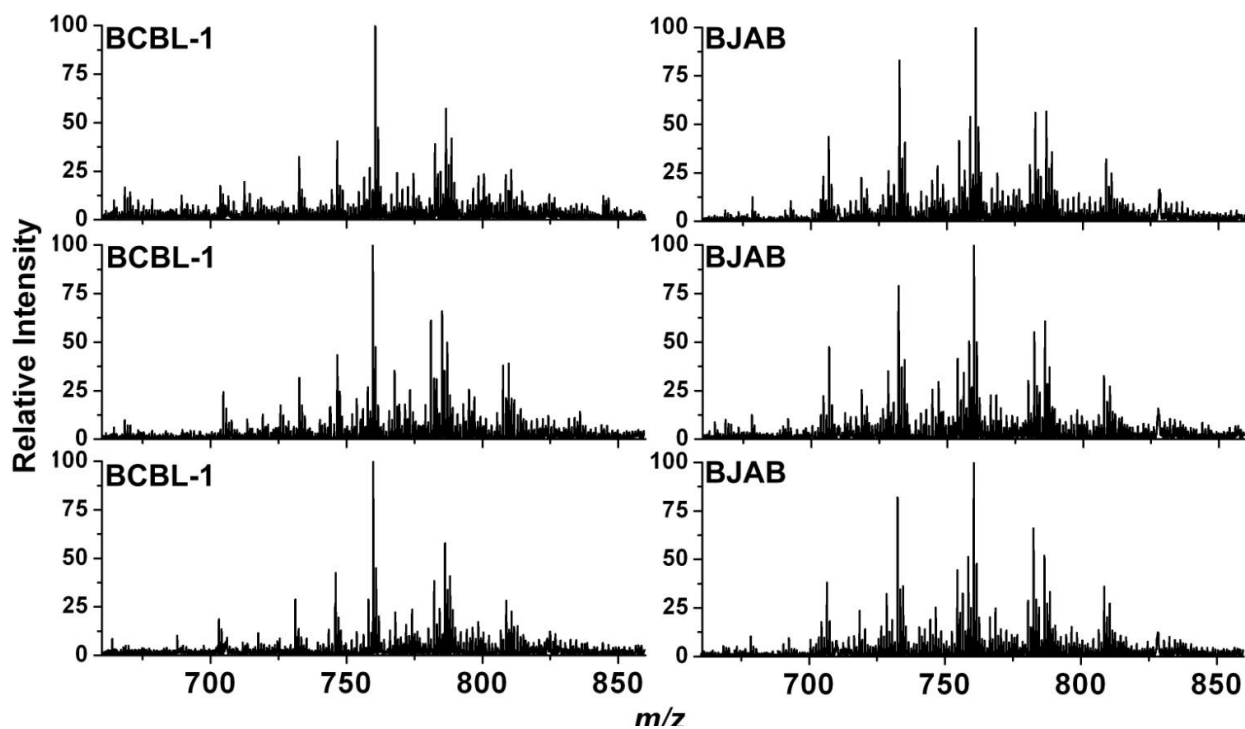

**Fig. S2** Comparison of technical variance (spectra within columns) and biological variance (spectra between columns) for LAESI-MS analysis of BCBL-1 and BJAB cell pellets. Differences between the two cell-lines clearly exceed the variations for a given cell line.

5

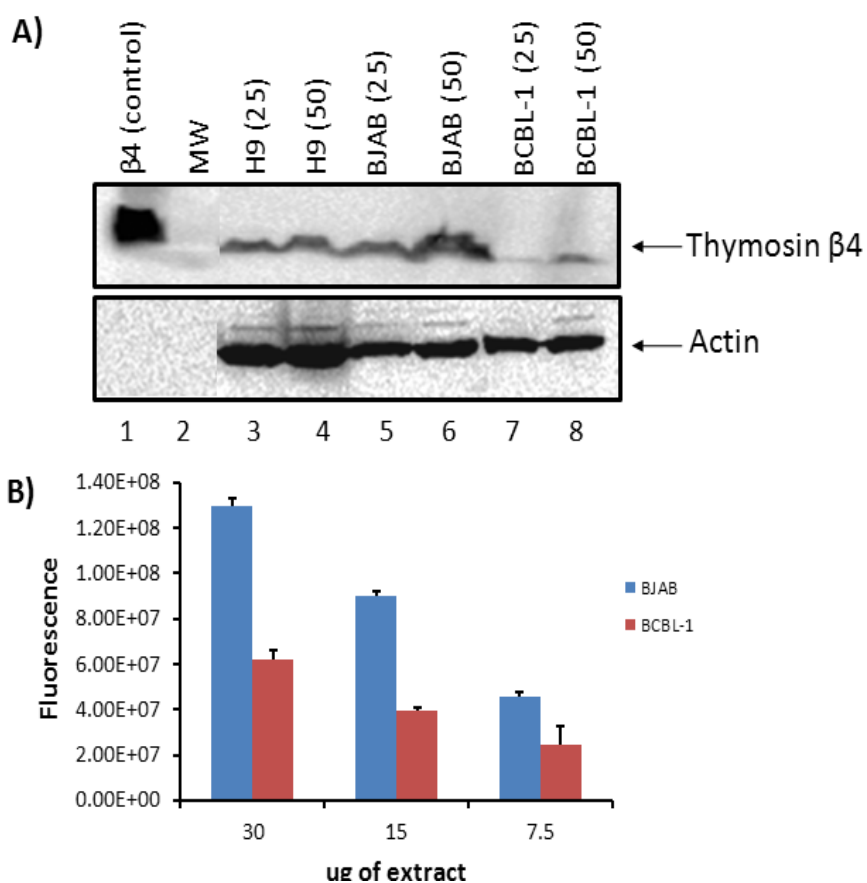

**Fig. S3** A) Anti-T $\beta$ 4 western blot of lysates from H9 T-cells, BJAB, and BCBL-1 point to lower concentrations of T $\beta$ 4 in the infected B cells. B) Lysates from BJAB and BCBL-1 cells assayed for total PC indicate downregulation in the infected cells.
